# Supplementary material for: Rationally Designed Peptidomimetic Modulators of Aβ Toxicity in Alzheimer's Disease
Source: PubMed Central journal article supplement (PMC4311240; doi:10.1038/srep08139), 2015-01-30

## **Supplementary Information**

### **Rationally Designed Peptidomimetic Modulators of A $\beta$ Toxicity in Alzheimer's Disease**

K. Rajasekhar,<sup>1</sup> S. N. Suresh,<sup>2</sup> Ravi Manjithaya\*<sup>2</sup> and T. Govindaraju\*<sup>1</sup>

<sup>1</sup>Bioorganic Chemistry Laboratory, New Chemistry Unit, Jawaharlal Nehru Centre for Advanced Scientific Research, Jakkur P.O., Bengaluru 560064, Karnataka, India

<sup>2</sup>Molecular Biology and Genetics Unit, Jawaharlal Nehru Centre for Advanced Scientific Research, Jakkur P.O., Bengaluru 560064, Karnataka, India

\*Email: ravim@jncasr.ac.in (R.M) and tgraju@jncasr.ac.in (T.G)

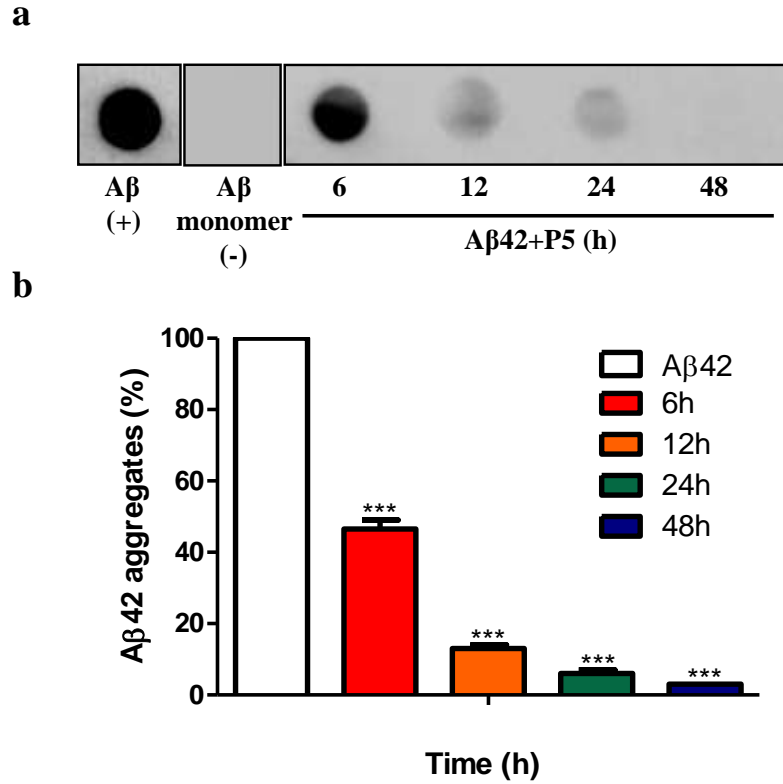

**Figure S1.** Dot blot analysis to show the dissolution of A $\beta$ 42 aggregates using **P5**. (a) A $\beta$ 42 (20  $\mu$ M) aggregates were incubated with **P5** at 37  $^{\circ}$ C in 1:2 stoichiometry and its influence on dissolution of aggregates is studied at different time points (6, 12, 24 and 48 h) by blotting sample on PVDF membrane and treating it with primary Anti-beta-amyloid 1-42 antibody (1:3000) specific for fibrillar aggregates, followed by anti-mouse secondary antibody (1:10000, conjugated with horseradish peroxidase (HRP)) treatment. The membrane was finally treated with enhanced chemiluminescence (ECL) reagent to measure chemiluminescence and quantify the dissolution of A $\beta$ 42 aggregates. (b) Plot of percentage of A $\beta$ 42 fibrillar aggregates present at different time point, when compared to control, exact amount of aggregates can be quantified at different time points (For example at 6 h,  $\sim$ 9  $\mu$ M concentration of A $\beta$ 42 aggregates present). Triplicate values for the control were plotted and a difference of 3 standard deviation (SD) units between the test and control was considered as significant.  $P < 0.05$ , \*\*\*.

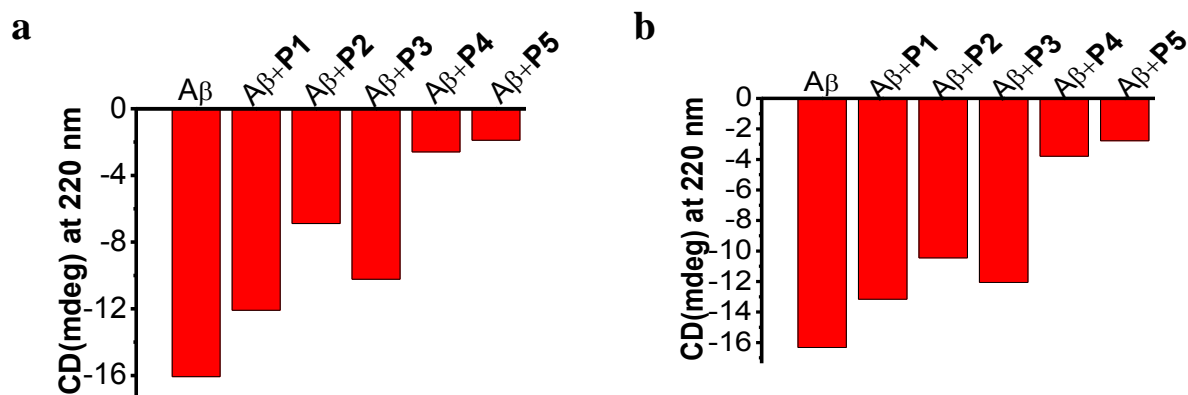

**Figure S2. Inhibition and reversal assay of Aβ42 aggregates by CD measurements.** **a** and **b** show the effects of 1:2 stoichiometry of peptides **P1**, **P2**, **P3**, **P4** and **P5** on the aggregation of 20 μM Aβ42 (on day 3 for the inhibition assay (a) and day 6 for the reversal assay (b)). **a** and **b** shows the intensity of negative signal at 218 nm (represents β-sheet content) observed in corresponding experiments. **P4** and **P5** effectively decreased the β-sheet content corresponding to Aβ42 aggregates compared to other three peptides (**P1-P3**).

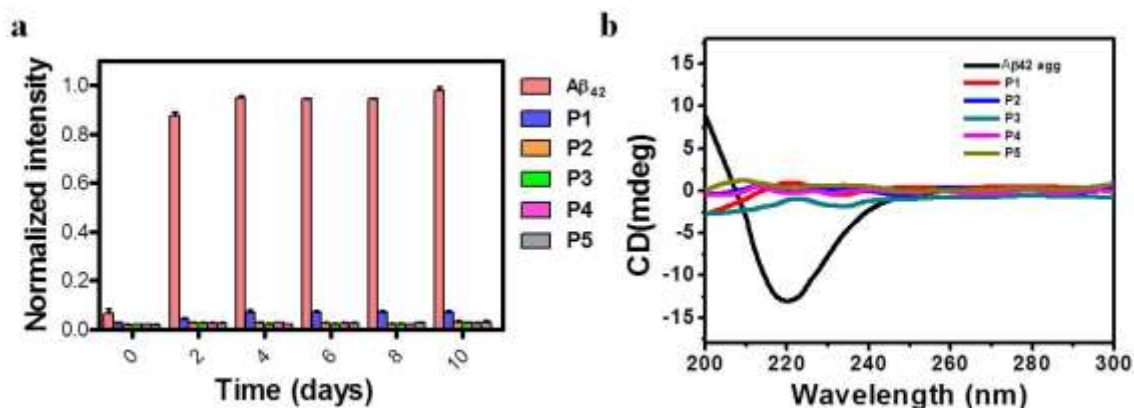

**Figure S3. Thioflavin assay and CD measurements for inhibitor candidates (P1, P2, P3, P4 and P5) incubated in isolation at 37 °C.** **a**, ThT fluorescence was monitored at 485 nm (normalized) for all the peptides (20 μM) in comparison to Aβ<sub>42</sub> fibrils (20 μM) from 0 to 10 days. **b**, CD measurement was performed for the same sample used on 10<sup>th</sup> day of ThT assay, which showed an absence of any distinctive signal corresponding to secondary structure. These data confirmed that **P1, P2, P3, P4** and **P5** are not capable of forming secondary structures by themselves and do not interfere with our measurements in ThT and CD measurements.

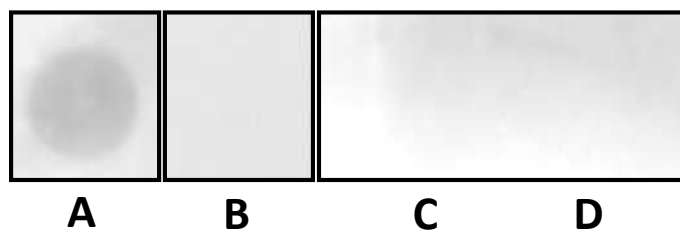

**Figure S4.** Dot blot analysis of A $\beta$ 42 (20  $\mu$ M) aggregates incubated with **P4** (**C**) and **P5** (**D**) in 1:2 (A $\beta$ 42: inhibitor) stoichiometry and incubated at 37 °C. A $\beta$ 42 toxic oligomeric species act as positive control (**A**) and A $\beta$ 42 (20  $\mu$ M) monomers as negative control (**B**). A11 (1:3000) is used as primary antibody and anti-mouse antibody (1:10000) conjugated with HRP as secondary antibody and further treated with ECL reagent for 1 min to record chemiluminescence.

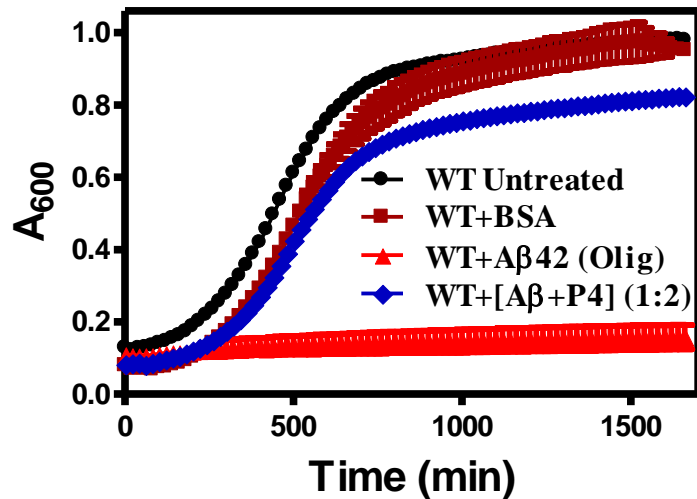

**Figure S5.** Growth curves of WT yeast cells (*Saccharomyces cerevisiae* BY4741) in presence of Aβ42 oligomers (50 μM) and Aβ42 (50 μM) aggregates treated with **P4** in 1:2 (Aβ42:**P4**) stoichiometry, at 37 °C. Readily formed Aβ42 oligomers incubated with wild type yeast cells showed prominent toxicity, whereas Aβ42+**P4** sample showed least effect on growth curve. This clearly shows that globular structures observed in the TEM for Aβ42+**P4** sample are not toxic oligomeric species.

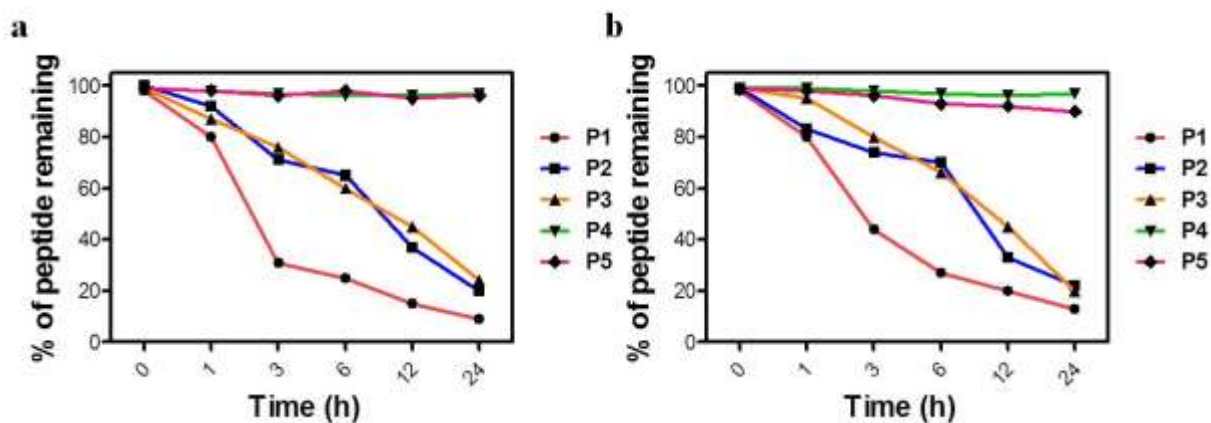

**Figure S6. Stability towards protease enzymes pepsin and trypsin. P1, P2, P3, P4 and P5 (50 mM) were incubated in with enzymes pepsin a and trypsin b in 100 mM formic acid buffer (pH 2) and 100 mM NH<sub>4</sub>HCO<sub>3</sub> buffer (pH 8) respectively. Percentage of intact peptide in each case was monitored at different time points for a duration of 24 h. P1, P2 and P3 degraded with time, whereas P4 and P5 showed high stability towards protease enzymes.**

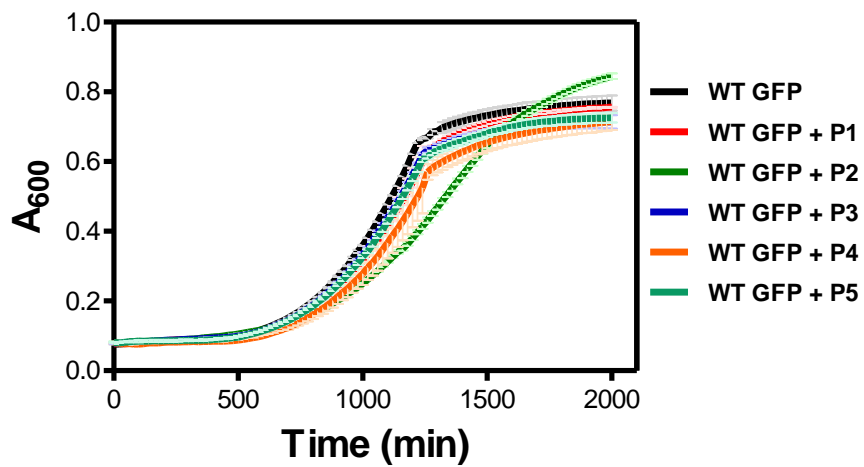

**Figure S7.** Analysis of peptide toxicities in yeast. Growth curves of WT GFP strain in presence or absence of all peptides were plotted. Concentration of peptides used was 300  $\mu$ M. Each experiment was repeated three times ( $n = 3$ ). Error bars represent the standard deviation (SD) of the fluorescence measurement.



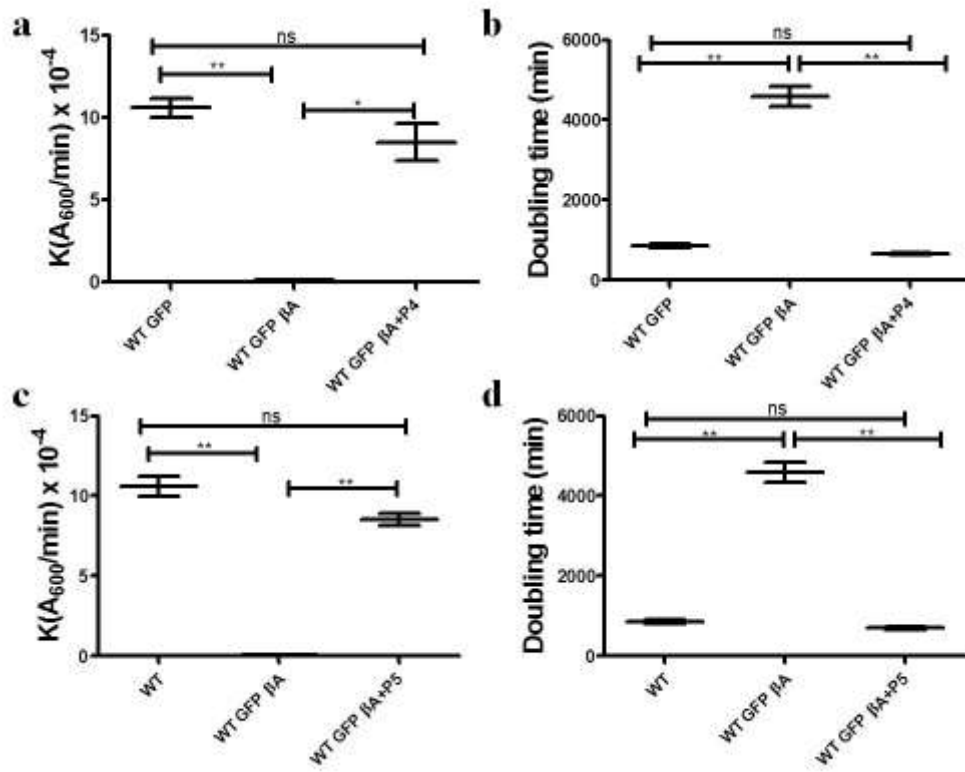

**Figure S8.** Growth parameters like growth rate and doubling time of WT GFP  $\beta A$  strain in presence and absence of **P4** (a & b) and **P5** (c & d) were examined.

### HPLC and HRMS traces for P1, P2, P3, P4 and P5

| Name      | Sequence                                | Actual mass | Obtained mass<br>[M+H] <sup>+</sup> |
|-----------|-----------------------------------------|-------------|-------------------------------------|
| <b>P1</b> | Lys-Leu-Val-Phe-Phe                     | 652.4186    | 652.4170                            |
| <b>P2</b> | <b>Thymine-</b> Lys-Leu-Val-Phe-Phe     | 818.4565    | 818.4581                            |
| <b>P3</b> | <b>Barbiturate-</b> Lys-Leu-Val-Phe-Phe | 820.4357    | 820.4373                            |
| <b>P4</b> | <b>Thymine-Sr-Leu-Sr-Phe-Sr-Ala</b>     | 728.3731    | 728.3716                            |
| <b>P5</b> | <b>Thymine-Lys-Sr-Val-Sr-Phe-Sr</b>     | 771.4153    | 771.4146                            |

Sr = Sarcosine (N-methylglycine).

#### P1

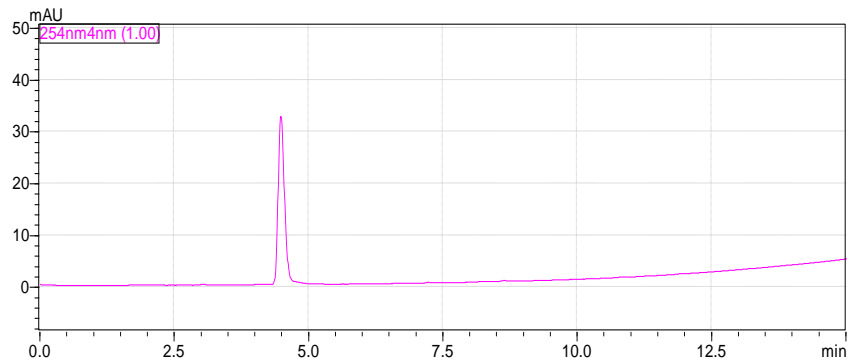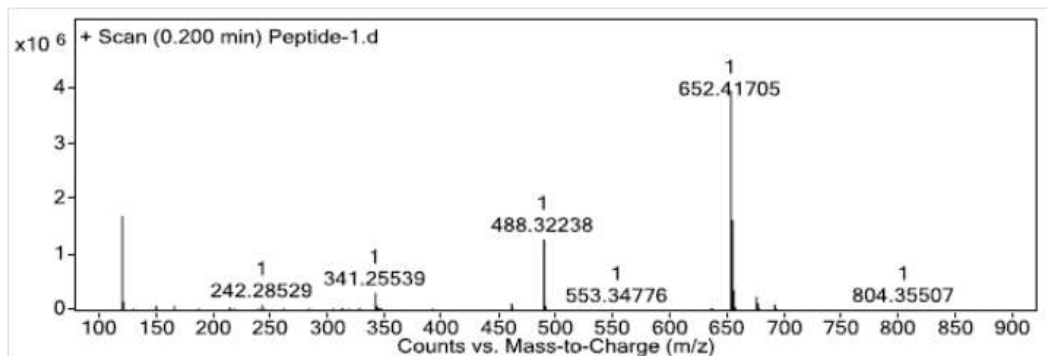

P2

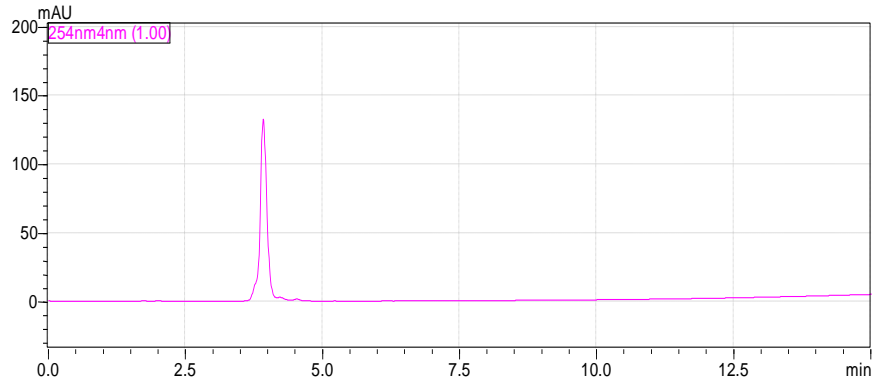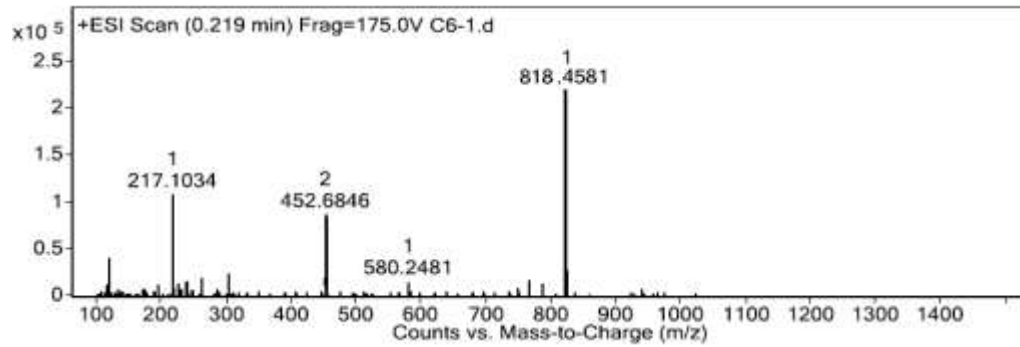

P3

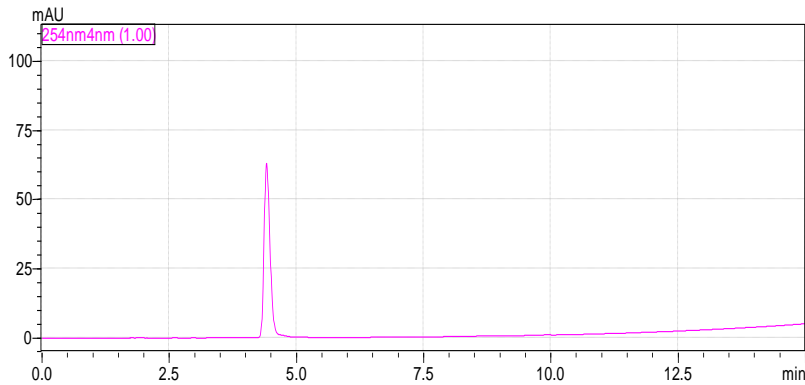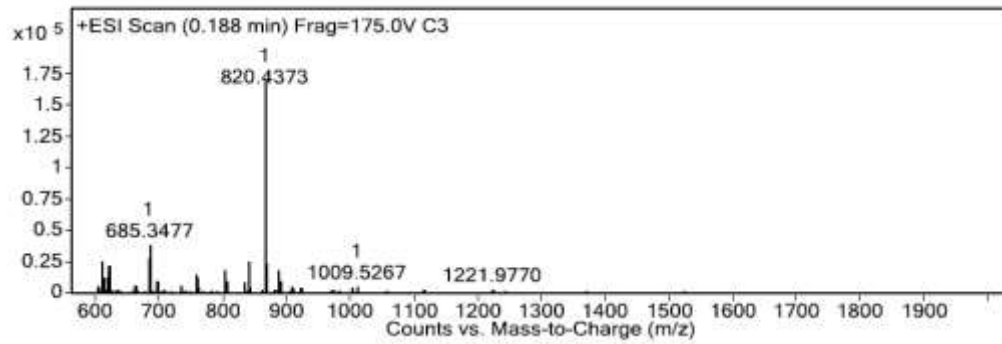

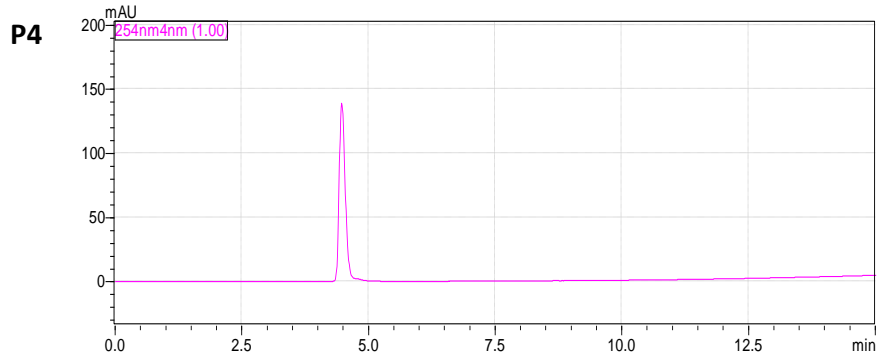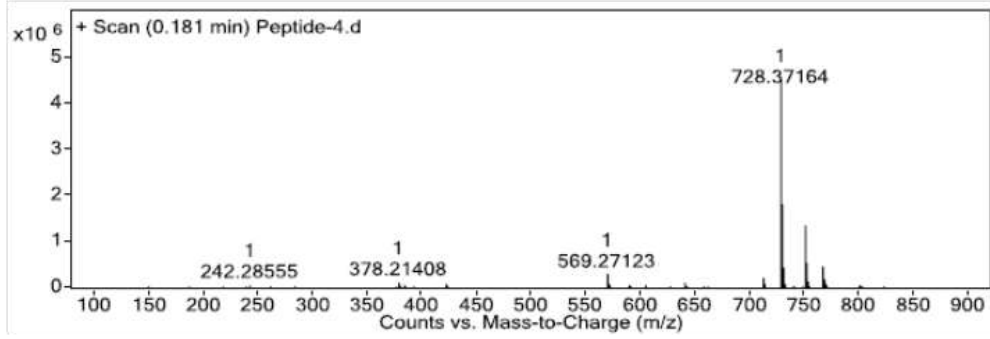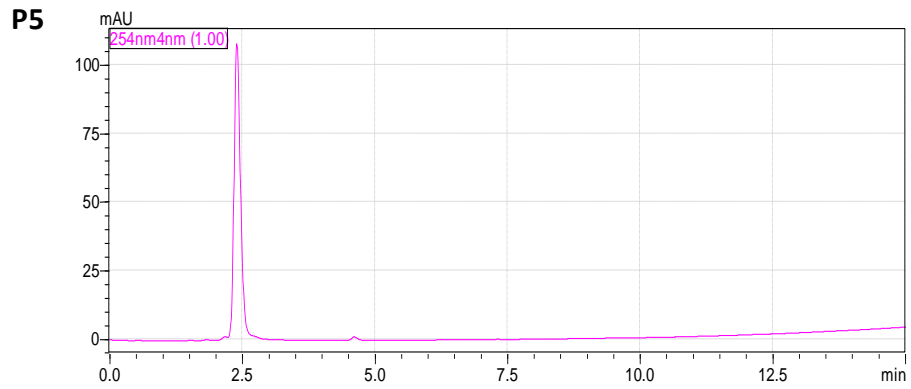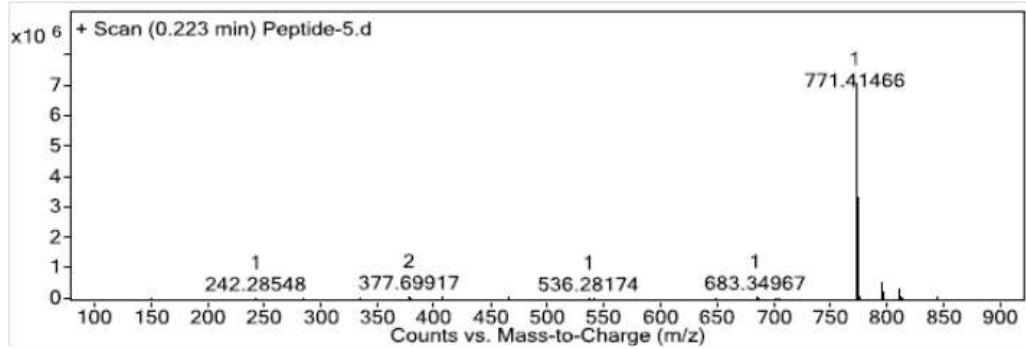

Supplement: srep08139-s1.pdf [file srep08139-s1.pdf]
